# Supplementary material for: Effect of light intensity in the nest site on eggshell pigmentation in a hole-nesting passerine
Source: PubMed Central journal article supplement (PMC10276044; doi:10.1038/s41598-023-36658-4), 2023-06-16
Supplement: 41598_2023_36658_MOESM1_ESM.pdf [file 41598_2023_36658_MOESM1_ESM.pdf]

## SUPPLEMENTARY INFORMATION

### EFFECT OF LIGHT INTENSITY IN THE NEST SITE ON EGGSHELL PIGMENTATION IN A HOLE-NESTING PASSERINE

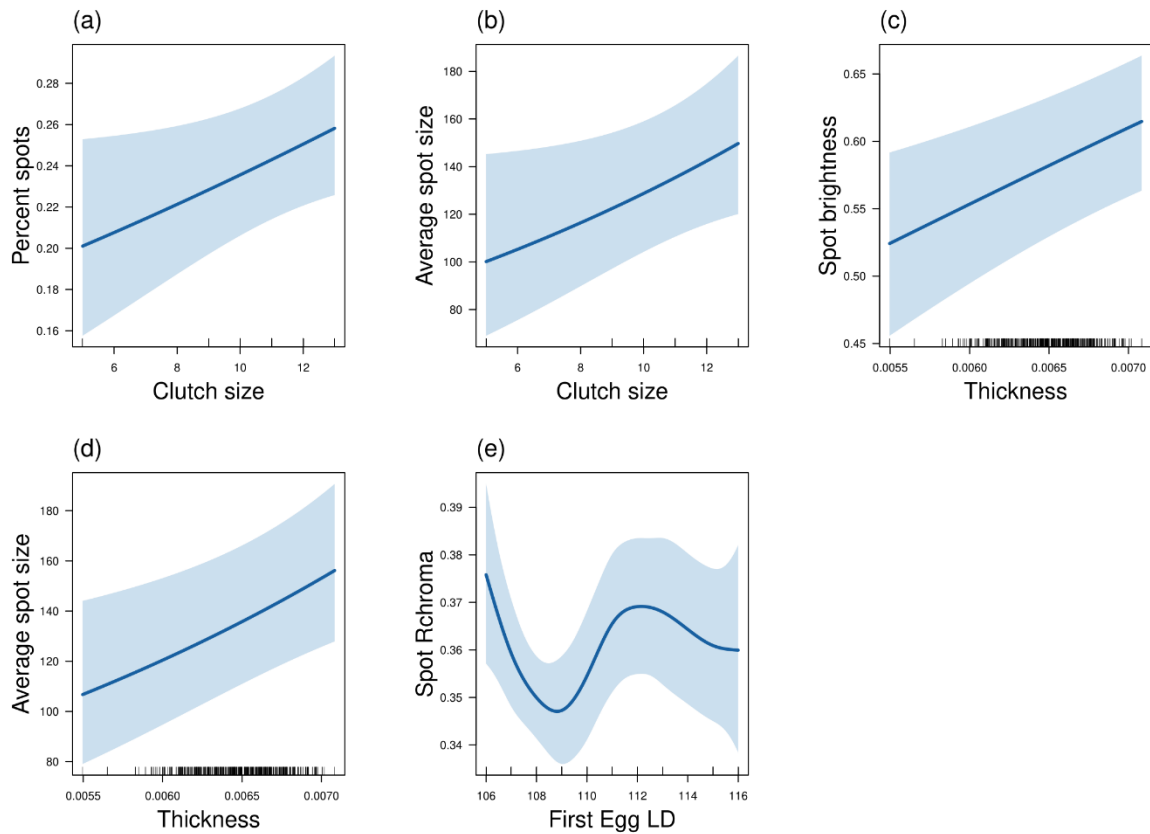

**Supplementary Figure S1 (a)-(e).** Conditional plots visualising significant effects of Great Tit egg characteristics on pigmentation traits presented on a response scale. Shaded areas indicate 95% confidence intervals, while tick marks represent data points. LD = laying date.
